# Supplementary material
Source: PubMed Central journal article supplement (PMC11105356)
Supplement: 18_2018_2773_MOESM1_ESM.pdf [file 18_2018_2773_MOESM1_ESM.pdf]

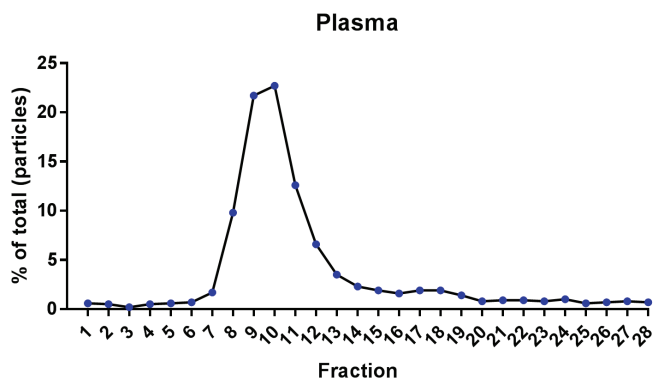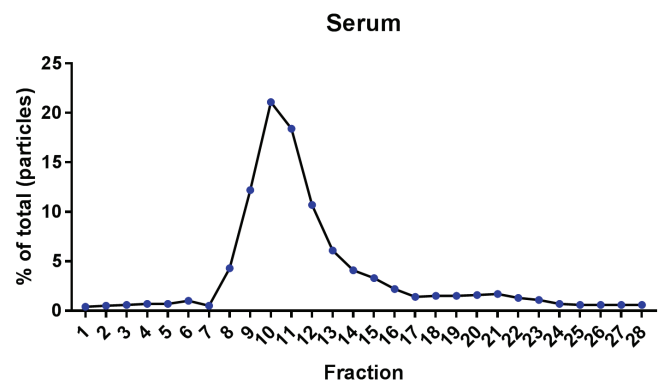

**Supplementary Figure 1**
